# Supplementary material
Source: ML conference proceedings conference paper supplement (https://proceedings.mlr.press/v119/crane20a.html)

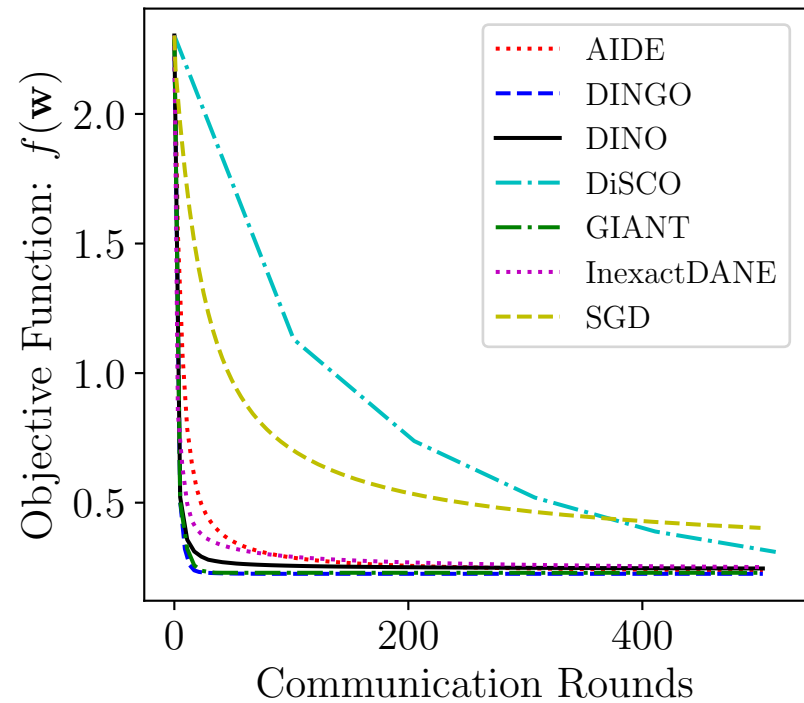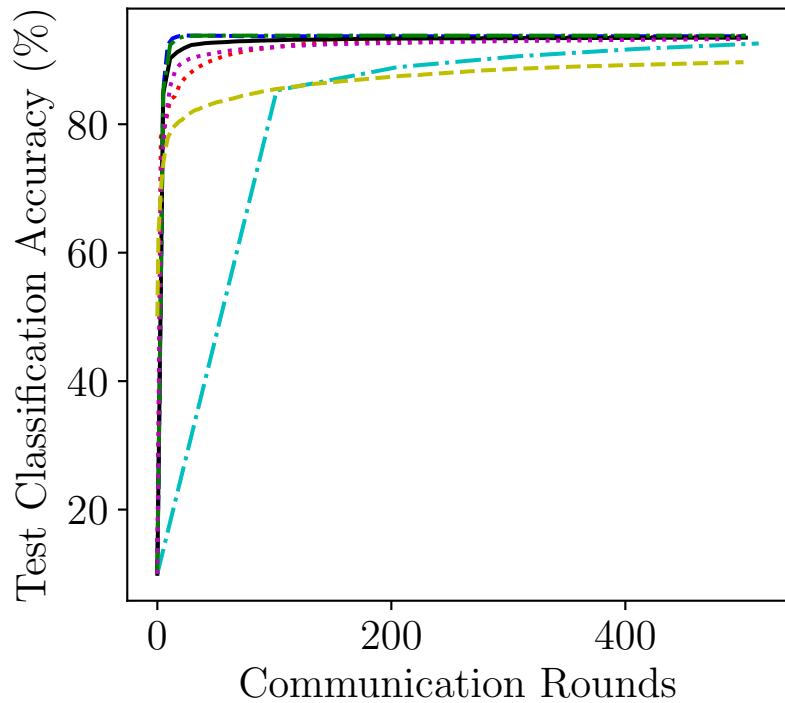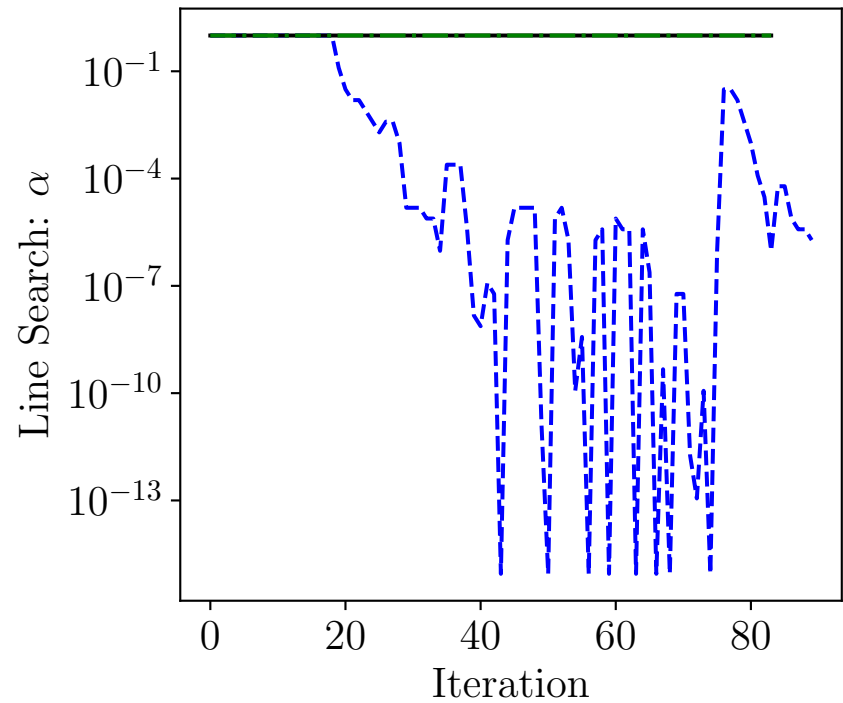

Supplement: Supplementary file 1 [file crane20a-supp.pdf]
